1 **Title: pH-dependent spontaneous hydrolysis rather than gut bacterial**  
2 **metabolism reduces levels of the ADHD treatment, Methylphenidate**

3

4 **Authors: Julia Aresti-Sanz<sup>1</sup>, Walid Maho<sup>2</sup>, Rob Rodrigues Pereira<sup>3</sup>, Hjalmar**  
5 **Permentier<sup>2</sup>, Sahar El Aidy<sup>1</sup>**

6

### 7 **Affiliations**

8 <sup>1</sup> Department of Molecular Immunology and Microbiology, Groningen Biomolecular  
9 Sciences and Biotechnology Institute (GBB), University of Groningen, Groningen,  
10 The Netherlands

11 <sup>2</sup> Department of Analytical Biochemistry and Interfaculty Mass Spectrometry Center,  
12 Groningen Research Institute of Pharmacy (GRIP), Groningen, The Netherlands

13 <sup>3</sup> Medical Center Kinderplein, Rotterdam, Netherlands

14

### 15 **\*Correspondence**

16 Sahar El Aidy. Department of Molecular Immunology and Microbiology, Groningen  
17 Biomolecular Sciences and Biotechnology Institute, University of Groningen,  
18 Nijenborgh 7,  
19 9747 AG Groningen, The Netherlands. P:+31(0)503632201.

20 E: sahar.elaidy@rug.nl

21

22

23

24

25

26 **Abstract**

27 Methylphenidate is absorbed in the small intestine. The drug is known to have low  
28 bioavailability and a high interindividual variability in terms of response to the  
29 treatment. Gut microbiota has been shown to reduce the bioavailability of a wide  
30 variety of orally administered drugs. Here, we tested the ability of small intestinal  
31 bacteria to metabolize methylphenidate. *In silico* analysis identified several small  
32 intestinal bacteria to harbor homologues of the human carboxylesterase 1 enzyme  
33 responsible for the hydrolysis of methylphenidate in the liver. Despite our initial  
34 results hinting towards possible bacterial hydrolysis of the drug, up to 60% of  
35 methylphenidate was spontaneously hydrolyzed in the absence of bacteria and this  
36 hydrolysis was pH-dependent. Overall, the study shows that pH-dependent  
37 spontaneous hydrolysis rather than gut bacterial metabolism reduces levels of  
38 methylphenidate and suggest a role of the luminal pH in the bioavailability of the  
39 drug.

40

41

42

43

44

45

46

47

48

49

50

51

## 52 **Introduction**

53 Attention-deficit/hyperactivity disorder (ADHD) is one of the most prevalent  
54 neurodevelopmental disorders, affecting 6-12% of children and persisting into  
55 adulthood in around 60% of the cases [1]. Although a cause-effect relationship has  
56 not yet been established for ADHD, altered levels of dopamine and norepinephrine,  
57 and their corresponding transporters in the brain, seem to play a key role in the  
58 cognitive impairment and dysregulated reward system that characterize ADHD [2,3].  
59 Thus, ADHD is mainly treated with amphetamine-like psychostimulants that improve  
60 symptoms by increasing the levels of dopamine and norepinephrine  
61 neurotransmitters in the brain.

62 Methylphenidate (MPH), a dopamine reuptake inhibitor, is considered as the golden  
63 treatment for ADHD [4,5]. MPH is administered orally and rapidly absorbed into the  
64 blood stream through the small intestine (SI), reaching peak concentrations between  
65 1- and 3-h post ingestion. Around 70% of MPH is recovered in urine in the form of  
66 ritalinic acid (RA). RA is the inactive metabolite of MPH produced in the liver by  
67 carboxylesterase 1 (CES1) [6]. Despite its efficacy, MPH has a low bioavailability of  
68 around 30%. Moreover, there is a high interindividual variability among patients in  
69 terms of their response to the treatment [7,8].

70 First-pass metabolism could explain the low bioavailability of MPH. Genetic variations  
71 in *CES1* have been shown to impact enzyme activity towards different substrates *in*  
72 *vitro* [9], which could account for differences in MPH hydrolysis among patients.  
73 Nevertheless, clinical human studies are scarce. Increased concentrations of MPH  
74 were found in plasma of individuals carrying a polymorphism in the *CES1* gene  
75 indicating decreased enzyme activity [10,11]. However, this study was performed on

76 a small number of healthy volunteers administered a single dose of MPH, which  
77 cannot be translated to ADHD patients on multiple doses per day of the drug.  
78 Recently, absorption of the drug was modelled based on physicochemical properties  
79 of the drug, formulation-related information, and differences in gut physiology along  
80 the gastrointestinal tract [12]. Importantly, non-specific intestinal loss of MPH had to  
81 be introduced in the model in order to obtain plasma profiles of MPH and RA  
82 comparable to those found in clinical studies. Thus, the model suggested intestinal  
83 loss of MPH prior to absorption and hepatic/systemic metabolism [12][13].  
84 Nonetheless, the mechanism explaining such non-specific intestinal loss remains to  
85 be explained, since the CES1 enzyme is absent in the gastrointestinal tract [14].  
86 The gut microbiota represents a metabolic factory able to synthesize indigenous and  
87 exogenous compounds, such as food components and drugs, in the host  
88 [15][16][17][18]. Bacterial metabolism of MPH could therefore explain the potential  
89 intestinal loss of MPH. Indeed, bacterial esterases that are able to hydrolyze carboxyl  
90 esters have been previously described [18]. For example, the highly abundant gut  
91 bacterium *Escherichia coli* harbors the esterase yjfP, which is able to hydrolyze the  
92 ester 4-nitrophenylacetate [19]. Similarly, *Bacillus subtilis* pnbA esterase has been  
93 shown to hydrolyze 4-nitrophenylacetate [20]. The present study investigates whether  
94 gut bacteria can metabolize MPH leading to increased presystemic metabolism and  
95 reduced bioavailability of the drug, thereby interfering with the efficacy of MPH  
96 medication in ADHD patients.

## 97 **Material and methods**

### 98 **Rat luminal content**

99 Luminal small intestinal content of wild-type Groningen (WTG) rats (n = 5) was  
100 collected in sterile Eppendorf tubes by gentle pressing along the entire cecum and

101 was snap frozen in liquid N<sub>2</sub> and stored at -80 °C. 10% (w/v) suspensions of the  
102 luminal content were grown in enriched beef broth based on SHIME medium (**S1**  
103 **Table**) [21]. Bacterial cultures within the inoculum were allowed to grow for 3 h,  
104 followed by supplementation with 50 µM Methylphenidate (MPH) hydrochloride  
105 tablets (10 mg, Mylan; provided by Dr. R. Pereira; Medical Center Kinderplein,  
106 Rotterdam, The Netherlands). MPH and were incubated at 37 °C in aerobic  
107 conditions with shaking at 220 rpm. Samples were collected at 0 and 24 h for HPLC-  
108 MS/MS analysis.

### 109 **Pure bacterial cultures**

110 *L. salivarius* W1, *L. plantarum* W24 and *E. faecium* W54 strains were obtained from  
111 Winclove Probiotic B.V. *C. ammoniagenes* DSM20306, *E. coli* DSM1058 and *E. coli*  
112 DSM12250 were obtained from the German Collection of Microorganisms and Cell  
113 Cultures (DSMZ). Additionally, the lab strains *E. coli* BW25113 [22] and the  
114 vancomycin-resistant strain *E. faecalis* V583 [23] were used in this study. All bacterial  
115 strains were grown in incubators (New Brunswick Scientific) at 37 °C aerobically in in  
116 enriched beef broth (**S1 Table**). For experiments where the effect of pH on MPH  
117 hydrolysis was studied (**Fig 3**), culture media were prepared at different pH values.  
118 To do so, buffer solutions of KH<sub>2</sub>PO<sub>4</sub>/K<sub>2</sub>HPO<sub>4</sub> were prepared at different  
119 concentrations to obtain the desired pH when adding them to the media. Strains  
120 which required shaking for proper growth (all *E. coli* strains, *C. ammoniagenes*  
121 DSM20306, *L. salivarius* W24 and *L. plantarum* W1) were grown with continuous  
122 agitation at 220 rpm. Bacteria were inoculated from -80 °C glycerol stocks and grown  
123 overnight. Before the experiment, cultures were diluted to 1% in fresh enriched beef  
124 broth medium and were grown until late exponential phase (**S2 Figure**). Growth was  
125 followed by measuring optical density (OD) at 600 nm in a spectrophotometer. 50 µM

126 MPH was added to the cultures and samples were taken at 0 and 24 h for HPLC-  
127 MS/MS analysis.

### 128 **HPLC-MS/MS sample preparation and analysis**

129 In order to monitor the levels of MPH and Ritalinic acid (RA) hydrochloride solution (1  
130 mg/mL as a free base, Sigma-Aldrich, The Netherlands) in bacterial cultures,  
131 samples were collected by adding 100  $\mu$ L of culture to 400  $\mu$ L of 100% methanol.  
132 The internal standard d10-Ritalinic acid (d10-RA) hydrochloride solution (100  $\mu$ g/mL  
133 as a free base; Sigma-Aldrich, The Netherlands) was added to all samples at a final  
134 concentration of 2 ng/ $\mu$ L as an internal standard for accurate quantification. Samples  
135 were then centrifuged at 14000 rpm for 15 min at 4 °C. Supernatants were  
136 transferred to a clean tube and methanol was evaporated using a Savant speed-  
137 vacuum dryer (SPD131, Fisher Scientific, Landsmeer, Netherlands). Finally, samples  
138 were reconstituted in 500  $\mu$ L of water.

139 Sample analysis was performed using a Shimadzu HPLC system consisting of a SIL-  
140 20AC autosampler, a CTO-20AC column oven and LC-20AD liquid chromatograph  
141 pumps. Chromatography separation was achieved using a Waters CORTECS C18+  
142 column (100x2.1 mm; 2.7  $\mu$ m). The mobile phase consisted of a mixture of water (A)  
143 and acetonitrile (B) both containing 0.1% formic acid. A flow rate of 0.25 mL/min was  
144 used with a linear gradient: 5% (B) for 5 min, followed by an increase to 80% (B) in 5  
145 min, which was kept for 3 min to wash the column and then returned to initial  
146 conditions for 2 min. The HPLC was coupled to an API3000 triple-quadrupole mass  
147 spectrometer (Applied Biosystems/MDS Sciex) via a turbo ion spray ionization  
148 source. Ionization was performed by electrospray in positive mode and selected  
149 reaction monitoring (SRM) was used to detect the metabolites. The SRM transitions  
150 were: m/z 234 to 84 for MPH, 220 to 84 for RA and 230 to 84 for d10-RA. Other

151 parameters were set as follows for all transitions: declustering potential 15 V,  
152 entrance potential 7 V, focusing potential 65 V, collision energy 30 V and collision cell  
153 exit potential 14 V.

#### 154 **Calibration standards and biological matrices**

155 MPH standard was obtained by extraction from MPH hydrochloride tablets (10 mg)  
156 as follows; one tablet was crushed in a mortar and the resulting powder was diluted  
157 in 10 mL of a mixture containing acetonitrile, methanol, and acetate buffer pH 4 (0.2  
158 M CH<sub>3</sub>COONa) in a ratio of 30:50:20, respectively. The solution was mixed with a  
159 magnetic stirrer for 10 min, and was allowed to stand until the solid phase containing  
160 the insoluble components of the tablets had precipitated. Next, the polar liquid phase  
161 containing MPH was collected with a syringe and sterilized using 0.2 µm filters. This  
162 resulted in stock solutions of 1 mg/mL of MPH which were stored at -20 °C until  
163 further use.

164 For MS quantification, calibration curves were obtained in different matrices to  
165 account for matrix effects in the detection of MPH and RA. Calibration samples  
166 containing MPH and RA in a concentration range of 0.01 to 5 ng/µL were prepared in  
167 methanol and 2 ng/µL of d10-RA was added as an internal standard to correct for  
168 intrasample variation of MPH and RA. Next, methanol was removed by vacuum  
169 centrifugation and samples were reconstituted in 500 µL of the relevant biological  
170 matrix. Two types of biological matrices were prepared. For quantification in pure  
171 bacterial cultures, *E. coli* BW25113 cultures were grown to late exponential phase  
172 (**S2 Figure**), cells were removed by centrifugation at 14000 rpm for 15 min and the  
173 supernatants were filtered and used for reconstitution. Similarly, a pool was made  
174 combining small intestinal content of 5 rats used in **Fig 1** to obtain a complex matrix  
175 for this experiment. The pooled inoculum was allowed to grow for 3 hours and

176 supernatant was obtained by centrifugation and filtering as explained before to be  
177 used for reconstitution of the calibration curves. Linearity of the detection of MPH and  
178 RA in both biological matrices is shown in **S1 Figure**.

## 179 **Bioinformatics**

180 Protein sequences of human CES1 (NCBI accession: AAI\_10339.1), *E. coli* yjfP  
181 (NCBI accession: ANK\_04958.1) and *B. subtilis* pnbA (NCBI accession:  
182 KIX\_83209.1) were BLASTed against the protein sequences from the NIH Human  
183 Microbiome Project data bank using search limits for Entrez Query  
184 "43021[BioProject]". All BLASTp hits were converted to a distance tree using  
185 MEGA5. The tree was exported in Newick format and visualized in iTOL phylogenetic  
186 display tool (<http://itol.embl.de/>).

## 187 **Statistical analysis**

188 All statistical tests and linear regression models were performed using GraphPad  
189 Prism 7.

## 190 **Results**

### 191 **Gut bacteria convert methylphenidate into ritalinic acid**

192 Between 65-75% of MPH is absorbed in the small intestine [12]. To determine  
193 whether small intestinal bacteria have the ability to metabolize and inactivate MPH by  
194 hydrolysis of the ester group (**Fig 1A**), small intestinal luminal samples from wild-type  
195 Groningen rats (n = 5) were incubated aerobically *in vitro* with 50  $\mu$ M MPH and the  
196 concentrations of MPH and RA were monitored by High-Performance Liquid  
197 Chromatography coupled with Tandem Mass Spectrometry (HPLC-MS/MS).  
198 Analytical details for the quantification method of both analytes are provided in **S1**  
199 **Figure**. The concentration of MPH employed was based on the estimation that well-  
200 absorbed drugs are present in the small intestine at concentrations  $\geq 20$   $\mu$ M [24].



201 Interestingly, there was a wide variation among the tested luminal samples in their  
202 ability to convert MPH into RA, ranging from samples that metabolized MPH to RA  
203 almost completely (90% metabolism), to samples where MPH was not metabolized to  
204 RA at all after 24 h (**Fig 1B**). The results suggest a role of gut bacteria in the  
205 conversion of MPH into RA. Gut microbiota may interfere with the bioavailable levels  
206 of MPH, which is absorbed in the upper gastrointestinal tract when taken as an  
207 ADHD medication.

### 208 **Gut bacteria harbor homologues for the human CES1 enzyme responsible for** 209 **metabolization of methylphenidate**

210 The human enzyme responsible for the hydrolysis of MPH to RA in the liver is CES1  
211 [25]. We hypothesized that gut bacteria harbor a homologue for the human CES1  
212 enzyme. To verify our hypothesis, the protein sequence (XP\_005255831.1) from the  
213 human CES1 enzyme was used as a query to search the US National Center of  
214 Health Human Microbiome Project (HMP) protein database. The analysis identified  
215 several bacterial genera; *Corynebacterium*, *Bifidobacterium*, *Bacteroides*, *Klebsiella*,  
216 *Citrobacter* and *Faecalibacterium* to harbor highly homologous proteins to the human  
217 CES1 annotated as esterases or carboxylesterases (**Fig 2A**). Next, we focused our  
218 search on two known bacterial esterases from *E. coli* and *B. subtilis*. The protein  
219 sequence (ANK\_04958.1) from *E. coli* yjfP esterase was used as a query to search  
220 the HMP protein database. The analysis identified bacteria belonging mainly to the  
221 Firmicutes phylum, as well as Proteobacteria. Specifically, *Enterococcus faecalis*,  
222 *Enterococcus faecium*, *Lactobacillus plantarum* and *Klebsiella* strains we found to  
223 harbor yjfP homologous proteins. Similarly, *Enterococcus* strains, *Faecalibacterium*,  
224 *Corynebacterium*, *Klebsiella*, *Citrobacter*, *Prevotella*, *Bacteroides*, *Bifidobacterium*

225 and *Pseudomonas* were identified to harbor *B. subtilis* pnbA (KIX\_83209.1)  
226 homologous proteins (**Fig 2A**).

227 Based on the *in-silico* analysis, a comprehensive screening of gut-associated  
228 bacterial strains harboring esterase proteins was performed. Out of all the bacteria  
229 found to harbor CES1, yjfP and pnbA homologues, we focused on gut bacteria  
230 known to inhabit the small intestine, the major site of MPH absorption [12]. To this  
231 end, pure cultures of the Gram-negative bacteria *Pseudomonas fluorescens* MFY63,  
232 *Escherichia coli* DSM12250, *E. coli* DSM1058, and the laboratory strain *E. coli*  
233 BW25113 were incubated aerobically with 50  $\mu$ M of MPH and were analyzed by  
234 HPLC-MS/MS (details of the quantification method in these cultures are shown in **S1**  
235 **Figure**). *P. fluorescens* MFY63, and *E. coli* BW25113 cultures displayed a  
236 conversion of 70% of MPH into RA after 24 h of aerobic incubation (**Fig 2B**). In the  
237 case of the gut isolates *E. coli* DSM1058 and *E. coli* DSM12250, 50% of MPH was  
238 hydrolyzed. In contrast, the Gram-positive bacteria *E. faecalis* V583, *E. faecium* W54,  
239 *L. plantarum* W1, *L. salivarius* W24, and *C. ammoniagenes* DSM20306 cultures did  
240 not metabolize MPH (**Fig 2B**) suggesting that certain Gram-negative bacteria are  
241 involved in the metabolism of MPH. Surprisingly, around 20% MPH was  
242 spontaneously hydrolyzed in the growth medium in the absence of bacteria, even  
243 higher than in the Gram-positive bacteria cultures.

#### 244 **pH of the bacterial growth media causes hydrolysis of methylphenidate in the** 245 **gut**

246 The spontaneous hydrolysis of MPH observed in the bacteria growth medium in the  
247 absence of bacteria (**Fig 2B**) led us to investigate the role of pH in MPH hydrolysis.  
248 In bacterial cultures where MPH was not metabolized, the pH measured after 24 h  
249 ranged from 4.0 - 5.5. In contrast, bacterial cultures that showed high levels of MPH

250 hydrolysis had a pH between 7.5 - 8.0. Moreover, the *E. coli* BW25113 cultures had a  
251 slightly higher average pH of 7.9 compared to *E. coli* DSM1058 and *E. coli*  
252 DSM12250, where the average pH was 7.5 and this was accompanied by a smaller  
253 percentage of MPH hydrolysis, 70% versus 50% respectively (**Fig 2B**). Indeed,  
254 Pearson r correlation analyses showed a strong positive correlation ( $r=0.89$ ,  
255  $r^2=0.79$ , P value = 0.0006) between MPH-hydrolyzing bacterial cultures and pH of  
256 the growth media. These findings suggest that pH of the bacterial culture, and not  
257 bacterial metabolic activity, is responsible for the hydrolysis of MPH into its inactive  
258 form, RA.

259 To further determine whether gut bacterial metabolic activity plays any role in the  
260 observed hydrolysis of MPH, MPH stability was tested in an enriched beef broth  
261 based on SHIME medium [21], the medium used in all our incubation experiments  
262 (**S3 Table**). Enriched beef broth was prepared at different pH values, ranging from  
263 5.5 to 8.0 resembling the pH values previously measured in the different bacterial  
264 cultures (**Fig 2B**), and was incubated aerobically with 50  $\mu$ M MPH for 24 h and  
265 analyzed by HPLC-MS/MS. At  $\text{pH} \leq 6$ , which resembles the pH measured in bacterial  
266 cultures that did not hydrolyze MPH,  $\geq 80\%$  of MPH remained intact, while 80% of the  
267 drug was hydrolyzed to RA at pH 8 (**Fig 3A**). Pearson r correlation analyses showed  
268 a strong positive correlation ( $r=0.98$ ,  $r^2=0.96$ , P value = 0.0005) between the pH  
269 value of the medium and the amounts of hydrolyzed MPH.

270 To determine whether the strong correlation found between pH and MPH hydrolysis  
271 could explain the differences in MPH metabolism in the bacterial pure cultures, we  
272 selected *E. coli* BW25113 that showed 70% hydrolysis of MPH into RA, and *E.*  
273 *faecium* W54 that did not hydrolyze the drug. *E. coli* BW25113 and *E. faecium* W54  
274 were grown in enriched beef broth at pH values ranging from 5.5 to 8.0, incubated

275 aerobically with 50  $\mu$ M MPH for 24 h and analyzed by HPLC-MS/MS. Changes in pH  
276 after 24 h of incubation were measured and compared to the initial pH values.  
277 When *E. coli* BW25113 was grown in enriched beef broth at pH  $\leq$  6.5, a negligible  
278 amount of MPH was hydrolyzed to RA after 24 h of incubation with 50  $\mu$ M MPH and  
279 the pH of the 24 h culture dropped to 5.0-5.5. In contrast, when *E. coli* BW25113  
280 was grown in enriched beef broth at pH  $\geq$  7 (the same pH of the culture plotted in **Fig**  
281 **2B**), the pH of the culture rose to 7.5-8.5 after 24 h of incubation with MPH and 70-  
282 90% of MPH was hydrolyzed to RA (**Fig 3B**). On the other hand, when *E. faecium*  
283 W54 was grown in enriched beef broth at pH  $\leq$  6.5 the pH of the culture dropped  
284 below 5 after 24 h of incubation with MPH and a negligible amount of MPH was  
285 hydrolyzed to RA. When *E. faecium* W54 was grown at pH  $\geq$  7, the pH of the cultures  
286 dropped to values between 6.5-5.5 and this was accompanied by only 20% MPH  
287 hydrolysis (**Fig 3C**). Pearson r correlation analyses showed a positive correlation  
288 between the pH value of the *E. coli* BW25113 cultures ( $r = 0.90$ ,  $r^2 = 0.81$ , P value  
289 = 0.03), *E. faecium* W54 ( $r = 0.93$ ,  $r^2 = 0.8701$ , P value = 0.02) and the amounts of  
290 hydrolyzed MPH. Taken together, these results support the hypothesis that the MPH  
291 hydrolysis by gut bacteria observed in **Fig 2B** is likely to be due to changes in pH  
292 over the duration of bacterial incubation with MPH.  
293 We next ruled out the possibility that certain components of the bacterial growth  
294 media could be catalyzing the hydrolysis of MPH. Medium composition (**S3 Table**)  
295 changes during the course of bacterial growth and their metabolism, which in turn,  
296 could deplete potential hydrolysis catalyzing agents. *E. coli* BW25113 and *E. faecium*  
297 W54 cultures were grown to late exponential phase (**S2 Figure**) and the  
298 supernatants were collected, filtered, and incubated with 50  $\mu$ M MPH. pH values of  
299 *E. faecium* W54 supernatants, which were around 5.5, were adjusted to 6.0, 7.0 and

300 7.5, respectively, to resemble the pH previously measured in the different bacterial  
301 cultures (**Fig 2B**). Interestingly, incubation of MPH with *E. faecium* W54 supernatants  
302 at pH 6 resulted in 10% hydrolysis of MPH to RA, but levels of hydrolysis increased  
303 with increasing pH values; 20-30% at pH 7 and 60% at pH 7.5, respectively (**Fig 4A**).  
304 When *E. coli* BW25113 supernatants, which had a pH around 7.0 were adjusted to  
305 7.5 to resemble the pH after 24h of growth (**Fig 2B**), the MPH hydrolysis increased  
306 from 20-30% at pH 7.0 (**Fig 2B**) to 60% at pH 7.5 (**Fig 4B**). Collectively, our results  
307 indicate that the majority of the observed hydrolyzed MPH results from pH-dependent  
308 spontaneous non-enzymatic conversion rather than from bacterial metabolism.

### 309 **Discussion**

310 Although our initial experiments using small intestinal luminal content from rats (**Fig**  
311 **1B**) suggested the capability of gut microbiota to metabolize MPH, our further  
312 observations of the spontaneous hydrolysis of MPH under physiological conditions  
313 (37 °C, pH 7.0)(**Fig 2B**), as well as the results from incubation of MPH in growth  
314 media in the presence and absence of pure bacterial cultures, uncovered the pH-  
315 dependent MPH hydrolysis, irrespective of the presence of bacteria (**Figs 3 and 4**).  
316 The complex bacterial community present in the luminal content could have caused  
317 fluctuations in the pH levels during the 24 h period of incubation with MPH. Thus, we  
318 anticipate that the MPH hydrolysis observed when incubated with the small intestinal  
319 luminal content was mainly caused by an elevation of pH values during the duration  
320 of incubation.

321 To our knowledge, this is the first report that describes the effect of pH on the stability  
322 of MPH. Besides the analytical profile of MPH, where significant basic degradation  
323 was observed only at extreme temperatures (100 °C), [26], the stability of MPH at  
324 different pH levels has not been investigated. Significant MPH hydrolysis was shown

325 at room temperature within only 30 min in a sodium hydroxide solution at extreme pH  
326 values [27][28]. Moreover, hydrolysis of MPH was also reported in static water [29],  
327 where MPH was completely hydrolyzed to RA within 37 h at 20 °C [29].  
328 Changes in the pH along the gastrointestinal tract could induce non-enzymatic  
329 degradation of the MPH and therefore account, at least in part, for the low  
330 bioavailability of the drug. In a fasting state, MPH is predominantly absorbed in the  
331 jejunum, while under fed conditions absorption takes place mostly in the ileum [12].  
332 Intraluminal pH changes along the gastrointestinal tract; the very acidic environment  
333 of the stomach rapidly changes in the SI, where pH increases up to 6 in the proximal  
334 SI and reaches 7.5 in the ileum [30]. This rise in the SI pH would result in 60% of  
335 MPH being hydrolyzed when it reaches the ileum (**Fig 3A**). Preventing MPH from  
336 reaching an increased pH in the ileum by taking the medication under fasting  
337 conditions could improve its bioavailability, as MPH would be absorbed higher up in  
338 the small intestine where a pH below 7 should limit the non-enzymatic hydrolysis to  
339 around 10% (**Fig 3A**). Reports on the pharmacokinetics of MPH comparing fed and  
340 fasting conditions are scarce and reveal contradictory results [31,32]. Although food  
341 intake tends to increase luminal pH of the gut [33], not enough information is  
342 available regarding the pH levels in the small intestine in fed or fasting conditions and  
343 how this could affect the bioavailability of MPH.

344 Microbial composition is another key factor that can influence the small intestinal pH  
345 and cause interindividual differences in MPH bioavailability. The gut microbiota is  
346 driven by the metabolism of dietary components[34]. For example, pH measured in  
347 ileostomy effluent from an ileostomy patient raised from 5.6 in the morning to 6.8 in  
348 the afternoon due to changes in feeding cycles [34] indicating that pH changes can  
349 indeed take place in the SI due to bacterial metabolism. Moreover, protein and amino

350 acid deamination by gut bacterial metabolism results in the production of amine  
351 groups and ammonia that can also increase luminal pH [35]. Thus, interindividual  
352 differences in small intestinal microbial composition could be a key factor in MPH  
353 presystemic hydrolysis by shifting luminal pH either towards acidic pH, providing  
354 stability for MPH, or alkaline pH which would prompt MPH hydrolysis.

355 MPH metabolism was tested among a wide variety of drugs for their possible  
356 degradation by the gut microbiota [36]. MPH was among the drugs that were  
357 metabolized the least; only less than 10 colonic strains (which were not specified in  
358 the study) were able to metabolize around 20% of MPH at  $\text{pH} \leq 6$  [36]. Given that the  
359 majority of MPH is absorbed before it reaches the colon and considering  
360 bioavailability is around 30% [12], colonic bacterial metabolism cannot explain the  
361 low bioavailability of MPH in the ADHD patients.

362 Collectively, the present study shows that MPH is subject to spontaneous hydrolysis  
363 in a pH-dependent manner. The pH values at which MPH was hydrolyzed resemble  
364 the pH of the jejunum and ileum respectively, which are the main sites of absorption  
365 of MPH when administered orally [6]. Thus, differences in the intraluminal pH of the  
366 gastrointestinal tract rather than gut bacterial metabolization of could explain the low  
367 bioavailability of the ADHD main treatment, MPH. Moreover, the study provides a  
368 significant addition to previous studies reporting on the low bioavailability and  
369 interindividual variation in the response to MPH [7,8]. The main limitation of the  
370 current study is the lack of clinical measurements in ADHD patients to assess  
371 whether the interindividual variation in the response to MPH is related to differences  
372 among subjects in their small intestinal intraluminal pH caused by differences in diet,  
373 gut microbiota composition and their metabolic products, administration of other

374 medications including antacids, MPH formulation administered, and whether the drug  
375 is taken in fasting or fed conditions.

## 376 **References**

- 377 1. Faraone S V, Sergeant J, Gillberg C, Biederman J. The worldwide prevalence  
378 of ADHD: is it an American condition? *World Psychiatry*. 2003 Jun;2(2):104–13.  
379 Available from: <http://www.ncbi.nlm.nih.gov/pubmed/16946911>
- 380 2. Del Campo N, Chamberlain SR, Sahakian BJ, Robbins TW. The roles of  
381 dopamine and noradrenaline in the pathophysiology and treatment of attention-  
382 deficit/hyperactivity disorder. Vol. 69, *Biological Psychiatry*. 2011.
- 383 3. Cho HS, Baek DJ, Baek SS. Effect of exercise on hyperactivity, impulsivity and  
384 dopamine D2 receptor expression in the substantia nigra and striatum of  
385 spontaneous hypertensive rats. *J Exerc Nutr Biochem*. 2014 Dec;18(4):379–  
386 84.
- 387 4. Volkow ND, Fowler JS, Wang GJ, Ding YS, Gatley SJ. Mechanism of action of  
388 methylphenidate: Insights from PET imaging studies. Vol. 6, *Journal of*  
389 *Attention Disorders*. 2002.
- 390 5. Castells X, Ramos-Quiroga JA, Rigau D, Bosch R, Nogueira M, Vidal X, et al.  
391 Efficacy of methylphenidate for adults with attention-deficit hyperactivity  
392 disorder: A meta-regression analysis. *CNS Drugs*. 2011 Feb;25(2):157–69.  
393 Available from: <http://www.ncbi.nlm.nih.gov/pubmed/21254791>
- 394 6. Kimko HC, Cross JT, Abernethy DR. Pharmacokinetics and clinical  
395 effectiveness of methylphenidate. Vol. 37, *Clinical Pharmacokinetics*. Adis  
396 International Ltd; 1999. p. 457–70. Available from:  
397 <http://link.springer.com/10.2165/00003088-199937060-00002>
- 398 7. Ermer JC, Adeyi BA, Pucci ML. Pharmacokinetic variability of long-acting



- 399 stimulants in the treatment of children and adults with attention-deficit  
400 hyperactivity disorder. Vol. 24, CNS Drugs. 2010. p. 1009–25. Available from:  
401 <http://link.springer.com/10.2165/11539410-000000000-00000>
- 402 8. Maldonado R. Comparison of the pharmacokinetics and clinical efficacy of new  
403 extended-release formulations of methylphenidate. Vol. 9, Expert Opinion on  
404 Drug Metabolism and Toxicology. 2013. p. 1001–14. Available from:  
405 <http://www.tandfonline.com/doi/full/10.1517/17425255.2013.786041>
- 406 9. Zhu HJ, Patrick KS, Yuan HJ, Wang JS, Donovan JL, DeVane CL, et al. Two  
407 CES1 Gene Mutations Lead to Dysfunctional Carboxylesterase 1 Activity in  
408 Man: Clinical Significance and Molecular Basis. *Am J Hum Genet.*  
409 2008;82(6):1241–8.
- 410 10. Stage C, Dalhoff K, Rasmussen HB, Schow Guski L, Thomsen R, Bjerre D, et  
411 al. The impact of human CES1 genetic variation on enzyme activity assessed  
412 by ritalinic acid/methylphenidate ratios. *Basic Clin Pharmacol Toxicol.*  
413 2019;125(1):54–61.
- 414 11. Stage C, Jürgens G, Guski LS, Thomsen R, Bjerre D, Ferrero-Miliani L, et al.  
415 The impact of CES1 genotypes on the pharmacokinetics of methylphenidate in  
416 healthy Danish subjects. *Br J Clin Pharmacol.* 2017;83(7):1506–14.
- 417 12. Yang X, Duan J, Fisher J. Application of physiologically based absorption  
418 modeling to characterize the pharmacokinetic profiles of oral extended release  
419 methylphenidate products in adults. *PLoS One.* 2016;11(10):1–28.
- 420 13. Yang X, Morris SM, Gearhart JM, Ruark CD, Paule MG, Slikker W, et al.  
421 Development of a physiologically based model to describe the  
422 pharmacokinetics of methylphenidate in juvenile and adult humans and  
423 nonhuman primates. *PLoS One.* 2014;9(9).

- 424 14. Hatfield MJ, Tsurkan L, Garrett M, Shaver TM, Hyatt JL, Edwards CC, et al.  
425 Organ-specific carboxylesterase profiling identifies the small intestine and  
426 kidney as major contributors of activation of the anticancer prodrug CPT-11.  
427 *Biochem Pharmacol.* 2011;81(1):24–31.
- 428 15. Rowland I, Gibson G, Heinken A, Scott K, Swann J, Thiele I, et al. Gut  
429 microbiota functions: metabolism of nutrients and other food components. *Eur J*  
430 *Nutr.* 2018;57(1):1–24.
- 431 16. Levy M, Thaïss CA, Elinav E. Metabolites: Messengers between the microbiota  
432 and the immune system. *Genes Dev.* 2016;30(14):1589–97.
- 433 17. Enright EF, Gahan GM, Joyce SA, Griffin BT. The Impact of the Gut Microbiota  
434 on Drug Metabolism and Clinical Outcome. 2016.
- 435 18. Leelesh Ramya S, Venkatesan T, Srinivasa Murthy K, Kumar Jalali S,  
436 Verghese A. Environmental Microbiology Detection of carboxylesterase and  
437 esterase activity in culturable gut bacterial flora isolated from diamondback  
438 moth, *Plutella xylostella* (Linnaeus), from India and its possible role in  
439 indoxacarb degradation. 2016; Available from:  
440 <http://dx.doi.org/10.1016/j.bjm.2016.01.0121517-8382/>
- 441 19. Johns N, Wrench A, Loto F, Valladares R, Lorca G, Gonzalez CF. The  
442 *Escherichia coli* yjFP Gene Encodes a Carboxylesterase Involved in Sugar  
443 Utilization during Diauxie. *J Mol Microbiol Biotechnol.* 2015;25(6):412–22.
- 444 20. Zock J, Cantwell C, Swartling J, Hodges R, Pohl T, Sutton K, et al. The *Bacillus*  
445 *subtilis* pnbA gene encoding p-nitrobenzyl esterase: cloning, sequence and  
446 high-level expression in *Escherichia coli*. *Gene.* 1994;151(1–2):37–43.
- 447 21. Auchtung JM, Robinson CD, Britton RA. Cultivation of stable, reproducible  
448 microbial communities from different fecal donors using minibioreactor arrays

- 449 (MBRAs). *Microbiome*. 2015 Dec;3(1):42. Available from:  
450 <http://www.microbiomejournal.com/content/3/1/42>
- 451 22. Datsenko KA, Wanner BL. One-step inactivation of chromosomal genes in  
452 *Escherichia coli* K-12 using PCR products. *Proc Natl Acad Sci U S A*. 2000  
453 Jun;97(12):6640–5.
- 454 23. Sahm DF, Kissinger J, Gilmore MS, Murray PR, Mulder R, Solliday J, et al. In  
455 vitro susceptibility studies of vancomycin-resistant *Enterococcus faecalis*.  
456 *Antimicrob Agents Chemother*. 1989;33(9):1588–91.
- 457 24. Maier L, Pruteanu M, Kuhn M, Zeller G, Telzerow A, Anderson EE, et al.  
458 Extensive impact of non-antibiotic drugs on human gut bacteria. *Nature*  
459 [Internet]. 2018;555(7698):623–8. Available from:  
460 <http://dx.doi.org/10.1038/nature25979>
- 461 25. Sun Z, Murry DJ, Sanghani SP, Davis WI, Kedishvili NY, Zou Q, et al.  
462 Methylphenidate is stereoselectively hydrolyzed by human carboxylesterase  
463 CES1A1. *J Pharmacol Exp Ther*. 2004 Aug;310(2):469–76.
- 464 26. Padmanabhan GR. Methylphenidate Hydrochloride. *Anal Profiles Drug Subst*  
465 [Internet]. 1981 Jan;10:473–97. Available from:  
466 <https://www.sciencedirect.com/science/article/pii/S0099542808606486>
- 467 27. Roychowdhury KK, Subramanian S. Drug-Excipient Interaction of Methyl-  
468 phenidate with Glycerin in Methylphenidate Oral Solution and Identification of  
469 its Transesterification Products by UPLC-MS/MS. *Am J Anal Chem*.  
470 2012;7:151–64. Available from:  
471 <http://www.scirp.org/journal/ajac><http://dx.doi.org/10.4236/ajac.2016.72013><http://dx.doi.org/10.4236/ajac.2016.72013>[http://creativecommons.org/licenses/by/4.0](http://creativecommons.org/licenses/by/4.0/)  
472 [http://creativecommons.org/licenses/by/4.0](http://creativecommons.org/licenses/by/4.0/)  
473 /

- 474 28. Naveen Kumar C, Kannappan N. A stability indicating method development  
475 and validation for determination of Methylphenidate Hydrochloride and its  
476 impurities in solid pharmaceutical oral dosage form by RP-HPLC as per ICH  
477 guidelines. Available online [www.jocpr.com](http://www.jocpr.com) J Chem Pharm Res.  
478 2015;7(5):606–29. Available from: [www.jocpr.com](http://www.jocpr.com)
- 479 29. McCallum ES, Lindberg RH, Andersson PL, Brodin T. Stability and uptake of  
480 methylphenidate and ritalinic acid in nine-spine stickleback (*Pungitius*  
481 *pungitius*) and water louse (*Asellus aquaticus*). Environ Sci Pollut Res. 2019  
482 Mar;26(9):9371–8.
- 483 30. Koziolok M, Grimm M, Becker D, Iordanov V, Zou H, Shimizu J, et al.  
484 Investigation of pH and Temperature Profiles in the GI Tract of Fasted Human  
485 Subjects Using the Intellicap® System. J Pharm Sci. 2015 Sep;104(9):2855–  
486 63.
- 487 31. Midha KK, McKay G, Rawson MJ, Korchinski ED, Hubbard JW. Effects of food  
488 on the pharmacokinetics of methylphenidate. Pharm Res. 2001  
489 Aug;18(8):1185–9. Available from:  
490 <http://www.ncbi.nlm.nih.gov/pubmed/11587491>
- 491 32. Weisler RH, Stark JG, Sikes C. Fed and Fasted Administration of a Novel  
492 Extended-Release Methylphenidate Orally Disintegrating Tablet Formulation  
493 for the Treatment of ADHD. Clin Pharmacol Drug Dev. 2018 Feb;7(2):160–7.  
494 Available from: <http://doi.wiley.com/10.1002/cpdd.361>
- 495 33. Deng J, Zhu X, Chen Z, Fan CH, Kwan HS, Wong CH, et al. A Review of  
496 Food–Drug Interactions on Oral Drug Absorption. Vol. 77, Drugs. Springer  
497 International Publishing; 2017. p. 1833–55.
- 498 34. Zoetendal EG, Raes J, Van Den Bogert B, Arumugam M, Boonjink CC, Troost

- 499 FJ, et al. The human small intestinal microbiota is driven by rapid uptake and  
500 conversion of simple carbohydrates. *ISME J.* 2012;6(7):1415–26. Available  
501 from: <http://dx.doi.org/10.1038/ismej.2011.212>
- 502 35. Oliphant K, Allen-Vercoe E. Macronutrient metabolism by the human gut  
503 microbiome: Major fermentation by-products and their impact on host health.  
504 *Microbiome.* 2019;7(1):1–15.
- 505 36. Zimmermann M, Zimmermann-Kogadeeva M, Wegmann R, Goodman AL.  
506 Mapping human microbiome drug metabolism by gut bacteria and their genes.  
507 *Nature.* 2019 Jun;570(7762):462–7. Available from:  
508 <http://www.nature.com/articles/s41586-019-1291-3>
- 509  
510  
511  
512  
513  
514  
515  
516  
517  
518  
519  
520  
521  
522  
523

524 **Acknowledgments**

525 We thank Dr. Saskia van Hemert of Winlove Probiotics, Amsterdam, The  
526 Netherlands, for providing us *L. salivarius* W1, *L. plantarum* W24 and *E. faecium*  
527 W54 strains, MEDICE Arzneimittel Pütter GmbH & Co KG. for financially contributing  
528 to the present research.

529 **Funding**

530 S.E.A. is supported by Rosalind Franklin Fellowships, co-funded by the European  
531 Union and University of Groningen.

532 **Author Contributions**

533 J.A., and S.E.A conceptualized and designed the study. J.A., W.M., and H.P.,  
534 performed the experiments. J.A., H.P. and S.E.A. analyzed the data. J.A. and S.E.A.  
535 wrote the original manuscript that was reviewed by R.P, and J.P. Funding was  
536 acquired by S.E.A.

537 **Conflicts of interest**

538 The authors declare no conflicts of interest.

539

540

541

542

543

544

545

546

547

548

549

## 550 Figures

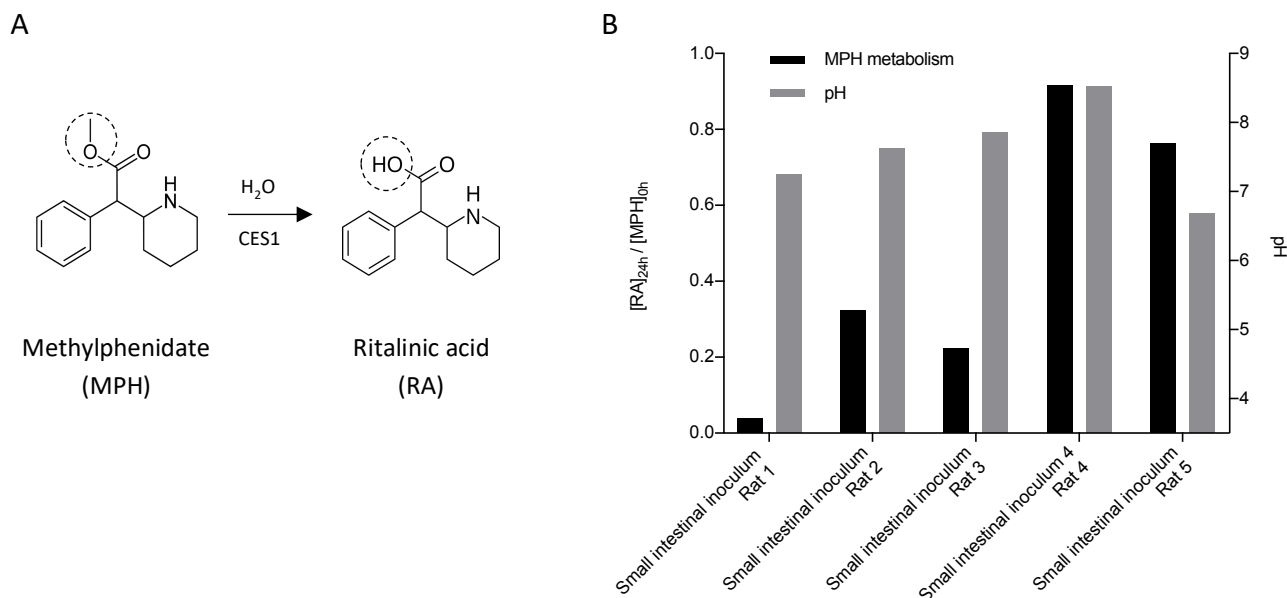

551

552

### 553 Fig 1. Methylphenidate (MPH) metabolism by small intestinal bacteria. (A)

554 Hydrolysis reaction by CES, which removes a methyl group from MPH to form ritalinic

555 acid (RA). (B) MPH metabolism by small intestinal luminal microbiota from WTG rats

556 ( $n = 5$ ) (black bars; left y-axis), and pH values measured in the cultures after 24 h of

557 incubation with  $50 \mu\text{M}$  MPH (grey bars; right y-axis). Metabolic activity is shown as

558 the ratio of  $[\text{RA}]_{24\text{h}}/[\text{MPH}]_{0\text{h}}$  quantified in  $\text{ng}/\mu\text{L}$  and normalized to d10-RA.

559

560

561

A

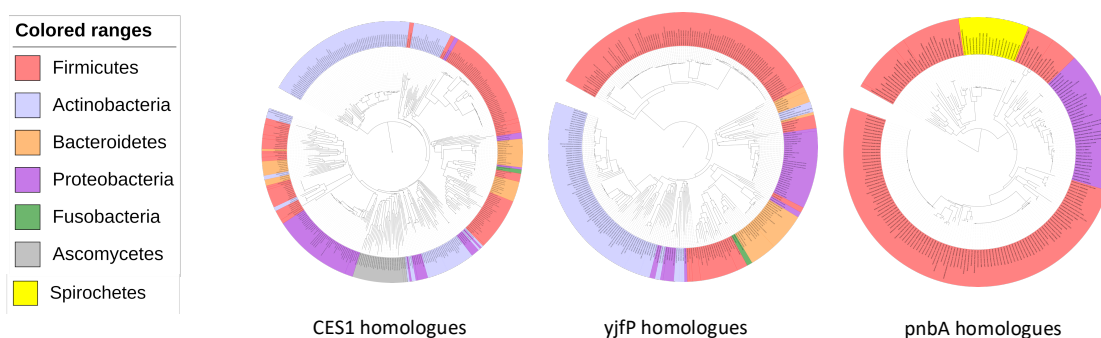

B

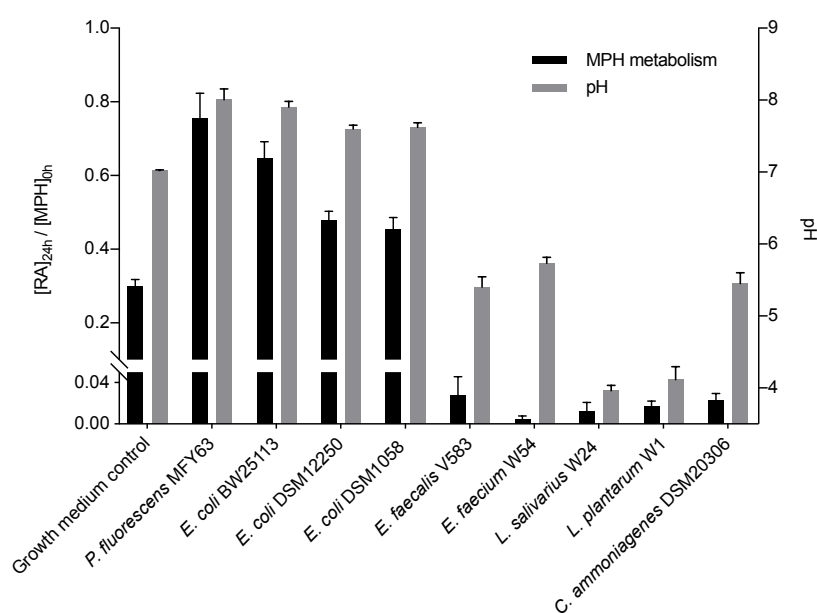

562

563 **Fig 2. Methylphenidate (MPH) metabolism by pure bacterial cultures. (A)**

564 Phylogenetic trees created using iTOL online tool showing gut bacterial strains

565 harboring homologue enzymes of human CES1, *E. coli* yjF and *B. subtilis* pnbA

566 respectively. (B) Screening of gut bacterial pure cultures for the metabolism of MPH.

567 Metabolic activity is shown as the ratio of [RA]<sub>24h</sub>/[MPH]<sub>0h</sub> quantified in ng/μL and

568 normalized to d10-RA (black bars; left y-axis) together with pH measurements in the

569 cultures after 24 h of incubation (grey bars; right y-axis) with 50 μM MPH. Error bars

570 represent standard deviation (n = 3).



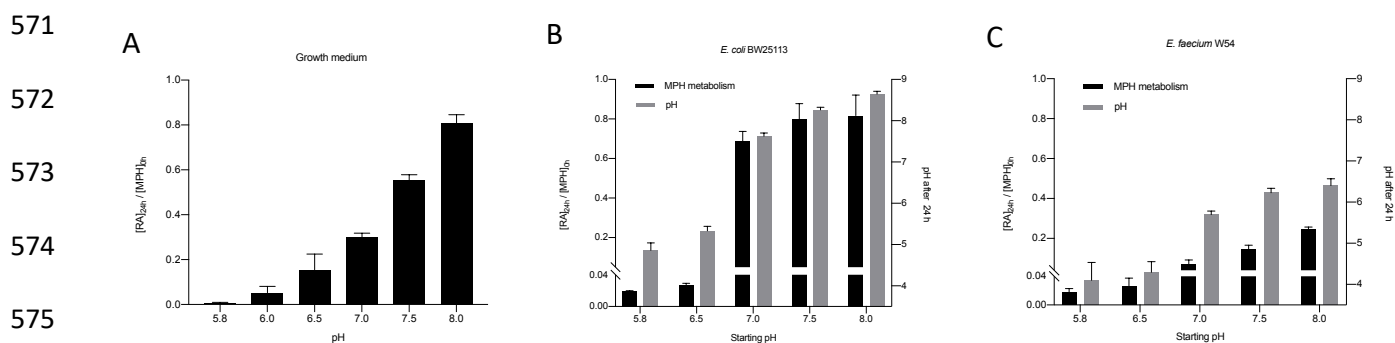

576

577 **Fig 3. Effect of pH on methylphenidate hydrolysis. (A)** MPH hydrolysis in growth  
578 medium prepared at different pH values. **(B, C)** pH effect on MPH hydrolysis in *E.*  
579 *faecium* W54 **(B)**, and *E. coli* BW25113 **(C)** (black bars; right y-axis) shown as the  
580 ratio of [RA]<sub>24h</sub> / [MPH]<sub>0h</sub> quantified in ng/μL and normalized to d10-RA and pH  
581 measurements after 24 h of incubation with 50 μM MPH (grey bars; right y axis).

582

583

584

585

586

587

588

589

590

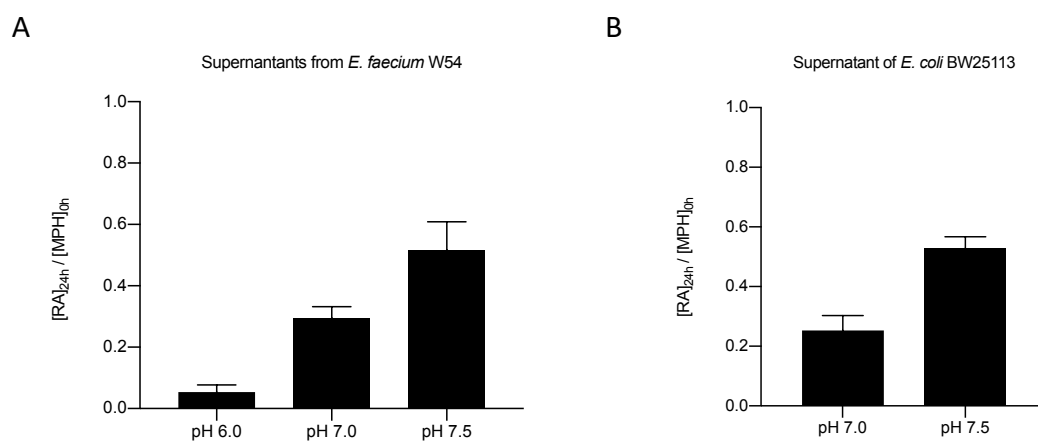

591

592 **Fig 4. Methamphetamine hydrolysis in bacterial supernatants.** MPH hydrolysis in  
593 supernatants of **(A)** *E. faecium* W54 and **(B)** *E. coli* BW25113 after adjusting the pH  
594 to different values. MPH hydrolysis in bacterial supernatants at different pH values,  
595 shown as the ratio of [RA]<sub>24h</sub>/[MPH]<sub>0h</sub> quantified in ng/ $\mu$ L and normalized to d10-RA  
596 after 24 h of incubation with 50  $\mu$ M MPH.

597

598

599

600

601

602

603

604

605

606

607

608

609

610 **Supplementary figures**

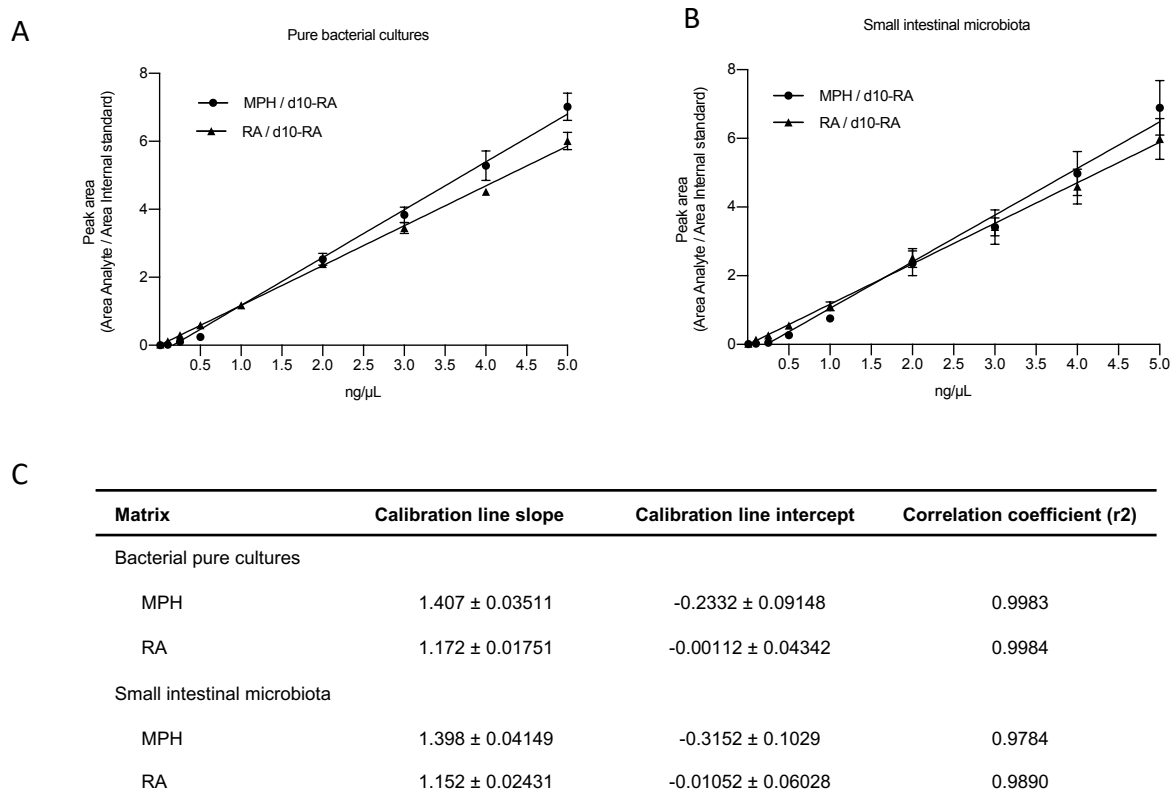

611

612 **S1 Figure. (A, B)** Calibration curves obtained in the two different biological matrices

613 used in this study: **(A)** pure bacterial cultures of *E. coli* BW25113 and **(B)** pool of

614 small intestinal content of 5 WTG rats. Peak areas of methylphenidate (MPH) and

615 ritalinic acid (RA) are normalized to the peak area of the internal standard d10-

616 Ritalinic acid (d10-RA). **(C)** Linearity of the calibration curves fitted with a linear

617 regression model. Data represents 3 biological replicates and error bars represent

618 standard deviation.

619

620

621

622

623

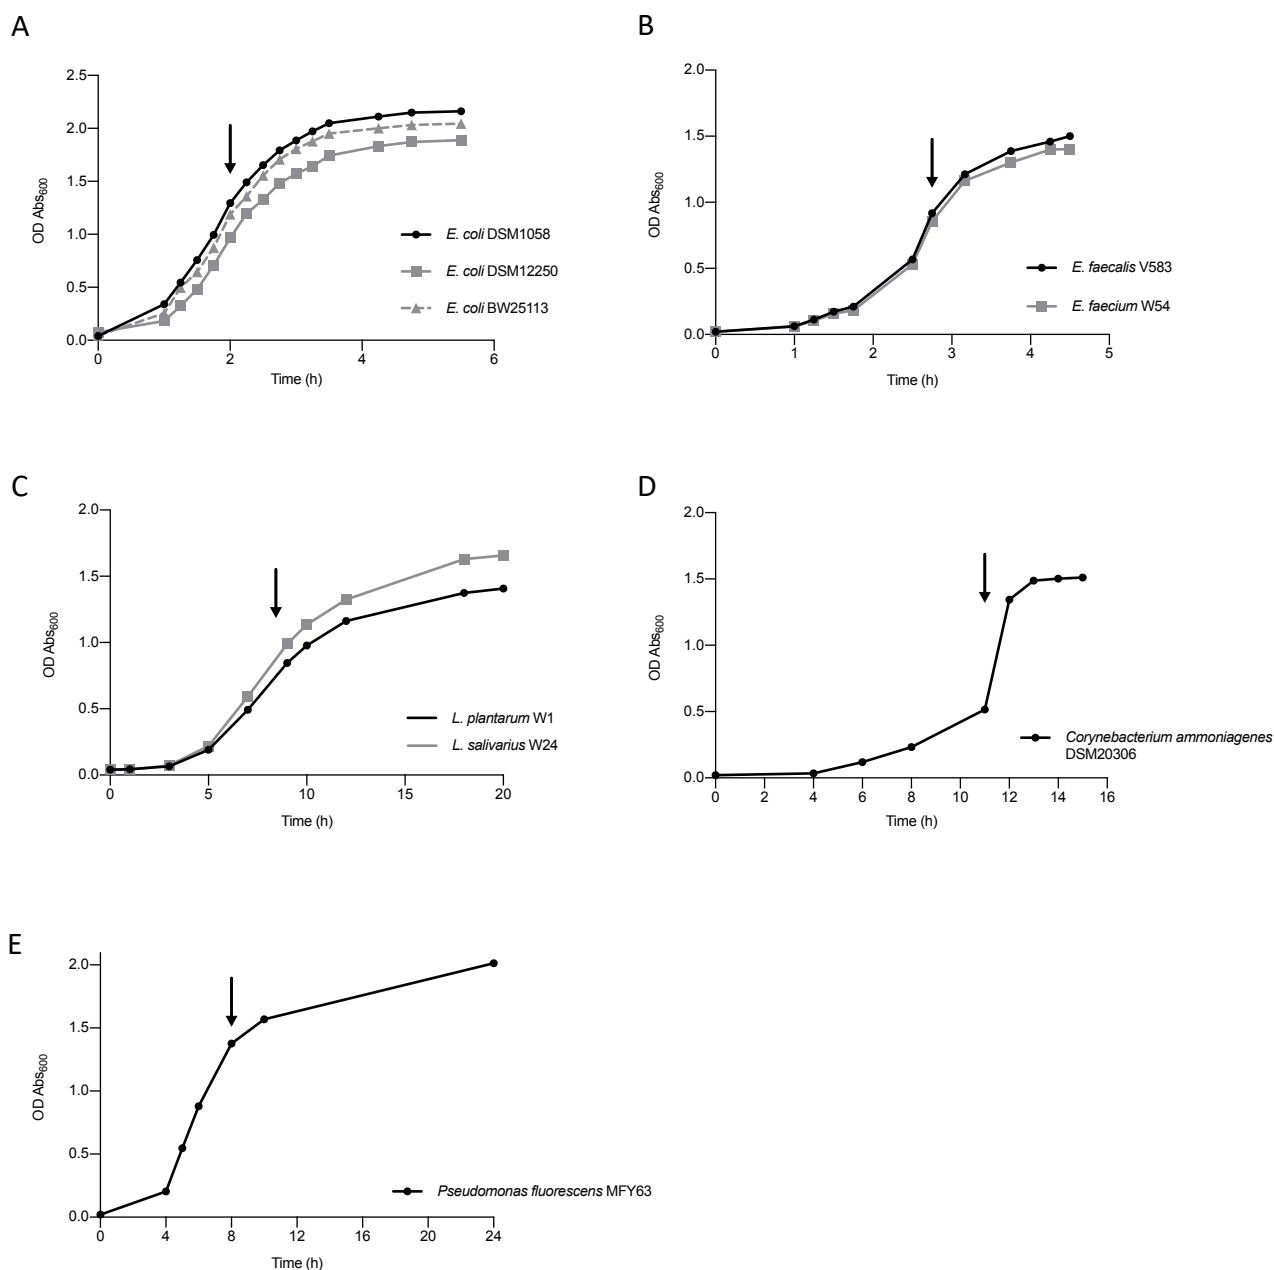

624

625 **S2 Figure. Growth curves of the strains used in this study.** Optical density

626 measured as the absorbance at 600 nm is plotted over time in aerobic cultures of (A)

627 *E. coli* strains (BW25113, DSM11250 and DSM1058) grown at 37 °C, 220 rpm; (B)

628 *Enterococcus* strains (*E. faecalis* V583 and *E. faecium* W54) strains grown at 37 °C

629 without agitation (C) *Lactobacillus* strains (*L. plantarum* W1 and *L. salivarius* W24)

630 grown at 37 °C, 220 rpm *Enterococcus* strains (*E. faecalis* V583 and *E. faecium*

631 W54) strains grown at 37 °C without agitation; (D) *C. ammoniagenes* DSM20306

632 grown at 37 °C, 220 rpm and **(E)** *P. fluorescens* MFY63 grown at 37 °C, 220 rpm.

633 Arrows indicate the late exponential phase when MPH was added.

634

635

636

637

638

639

640

641

642

643

644

645

646

647

648

649

650

651

652

653

654

655

656

657

| Salts and carbon sources        |       | Vitamin solution              |        | Trace elements                                      |       |
|---------------------------------|-------|-------------------------------|--------|-----------------------------------------------------|-------|
| Component                       | g/L   | Component                     | g/L    | Component                                           | g/L   |
| Glucose                         | 2.000 | D-Biotin                      | 0.0020 | EDTA                                                | 1.000 |
| NaCl                            | 0.080 | D-Pantotheic acid             | 0.0100 | ZnSO <sub>4</sub> .7H <sub>2</sub> O                | 0.178 |
| K <sub>2</sub> HPO <sub>4</sub> | 5.310 | Ca <sub>2</sub> .Nicotinamide | 0.0050 | MnSO <sub>4</sub> .7H <sub>2</sub> O                | 0.452 |
| KH <sub>2</sub> PO <sub>4</sub> | 2.650 | Vitamin B12                   | 0.0005 | FeSO <sub>4</sub> .7H <sub>2</sub> O                | 0.100 |
| NaHCO <sub>3</sub>              | 0.400 | Para-aminobenzoic acid        | 0.0050 | CoSO <sub>4</sub> .7H <sub>2</sub> O                | 0.181 |
| Beef extract                    | 5.000 | Riboflavin                    | 0.0050 | CuSO <sub>4</sub> .7H <sub>2</sub> O                | 0.010 |
| Yeast extract                   | 3.000 | Folic acid                    | 0.0020 | H <sub>3</sub> BO <sub>3</sub>                      | 0.010 |
| Peptone                         | 0.600 | Pyridoxal-5-Phosphate         | 0.0100 | Na <sub>2</sub> MoO <sub>4</sub> .2H <sub>2</sub> O | 0.010 |
| CaCl <sub>2</sub>               | 0.008 | Vitamin K1                    | 0.0005 | NiSO <sub>4</sub> .6H <sub>2</sub> O                | 0.111 |

658 **S3 Table.** Constituents of enriched beef broth medium used in this study.

|                   |       |             |        |
|-------------------|-------|-------------|--------|
| MgSO <sub>4</sub> | 0.008 | Thiamin HCl | 0.0040 |
| Cysteine          | 0.500 |             |        |

---

659
